# Supplementary material for: Red LED Light Improves Pepper (Capsicum annuum L.) Seed Radicle Emergence and Growth through the Modulation of Aquaporins, Hormone Homeostasis, and Metabolite Remobilization
Source: MDPI journal article supplement (doi:10.3390/ijms24054779), 2023-03-01
Supplement: s1 [file s1]

**Supplemental Table S1.** List of CaAQP gene primers used for gene expression

| <b>CaAQP isoforms</b> | <b>Forward Primer</b>    | <b>Reverse Primer</b>    |
|-----------------------|--------------------------|--------------------------|
| CaNIP1;1              | TCAGTAGTGGTGAATGCAGATAAA | GCAAGTGGCAAAGGCAATAG     |
| CaNIP1;2              | TCTATGGGTTTACTTGTTAGGC   | GGCCTAACAAAGTAAACCCATAGA |
| CaNIP3;1              | CGTTGTCACACTACCTGGAAT    | CAATGGTAACAGCAGGGTTAAAG  |
| CaNIP4;1              | CACGTATCGGGTGGTCATTT     | GACCCTGTTACCTGAGCTATTATG |
| CaNIP4;2              | CAGGGATATGTGTGACATGGG    | GACGGAAGAGGGTGAAAGTAATAG |
| CaNIP4;5              | GCCAGTATCAGGAGCATCAA     | GCCCAACTATGTAAACCCAAAG   |
| CaNIP4;6              | GGAGAACTCACTGGACTTGTTAT  | CAAACCTTCTTGCGGGATTTCATT |
| CaNIP6;1              | GACCGTCATGCTCAACATACT    | CTTGTAGTTTCCTGCTGCTACT   |
| CaNIP7;1              | GAACCCAGCCAGGTCTTTAG     | CTCCTGCAACAGCTCCTATAAT   |
| CaPIP1;1              | GGCCTGGACGCTGAAATAA      | CAAGACTCCTAACTGGGTTGATAC |
| CaPIP1;2              | GGATTTGCGGTGTTCCTAGT     | TGCGGGTTCCTTGTTATAGATG   |
| CaPIP1;3              | AGAGACTCCCATGTCCCTATT    | TAATGCCAGTGCCTGTGATAG    |
| CaPIP1;4              | CGGTGTTCTTGTTTCATTG      | AGCTTGGTCTTGTTGAAGAT     |
| CaPIP1;5              | GTATCTCAGGAGGACACATCAAC  | CCAAGGCACTGCATCACTAT     |
| CaPIP2;2              | ATAGCACGGGTACTGGTTTG     | GAGTCTCTGGCGTTTCTCTTAG   |
| CaPIP2;3              | TGGCCACCATCCCAATTAC      | CCATTGGTCCAACCCAGAATA    |
| CaPIP2;4              | TGTGGTGGTGTGGTATTCTT     | GGGTAAATGTGTCTCCAGAAA    |
| CaPIP2;5              | GATGGTGTGGTATTCTTGATTG   | TGTCAGTGTGGGTAAATATGT    |
| CaPIP2;6              | ATAGCACGGGTACTGGTTTG     | GAGTCTCTGGCGTTTCTCTTAG   |
| CaPIP2;7              | TGGTTCACCTAGCCACCATAC    | CGCCTTGTCACCATTGTAAATAA  |
| CaPIP2;8              | GTCTTGGCACCATTTCCTATT    | AAACTACGAGCCGGGTAAATAC   |
| CaTIP1;2              | CTTGGGTGGTGGACTTCTTT     | CGAATGGACCGAGCCAATAA     |
| CaTIP1;4              | AGCAATGAACCCTGCTATGG     | AATGGTAGCACCCACGAATG     |
| CaTIP1;6              | CCTTTCTGGGAGGTCACATTT    | GCAATCTTGAGGAGGAAGAGAG   |
| CaTIP1;7              | AGCAATGAACCCTGCTATGG     | CGAATGGACCGAACCAGTAAA    |
| CaTIP1;8              | CCTTTCTGGGAGGTCACATTT    | GCAATCTTGAGGAGGAAGAGAG   |
| CaTIP1;10             | CCAAAGAGACAACCGCTATGA    | GTTACATGACCTCCCGATATG    |
| CaTIP1;11             | GGCTGATTTGGGAGGCAATA     | CCAAATGTGACAGCAGGATTTAC  |
| CaTIP1;12             | GCGGTTGGTGCTAACATTTT     | AAGCAATTGAGCAACCCAATAC   |
| CaTIP1;13             | TGCTTGCTCCTCAAGTATTCC    | GCCCAAATGTCGTCACTATCT    |
| CaTIP2;1              | TTAACCCTGCTGTCACCTTC     | GAGGAGGATGCAAGCTACAA     |
| CaTIP2;2              | GCTCTCTTTGTGGCTGTTTCT    | GTCCGGTAAGGATGGTGATTTG   |
| CaTIP2;3              | TGAACCCAGCTCGATCATTT     | CCATAAATAAACCCGGCCAATC   |
| CaTIP3;1              | GTCCTTGTAGGTGGTCCTTTC    | TCCTCCATCTCCAGCCTATAA    |
| CaTIP3;2              | GCGCATGCTTTATCGCTATTT    | AGGTAACAGCTGGGTTGATG     |
| CaTIP4;1              | GAGATCCACTGGTGAGCTTATT   | AGTGTAACAGCAGGGTTGAG     |
| CaTIP5;1              | GGGATCTATGAACCCTGCTTAC   | TGCAGGGAAGACCACATTATC    |
| CaSIP1;1              | CCTCTTCATCACCACCCTTATT   | TCCAAGACCAGCAGCATAAA     |
| CaXIP1;1              | GGCCATGTCACTGTATTGTCTA   | GAAACACCTAGCCGGATTCA     |
| CaXIP1;2              | GGCAGGCATTCTTGTTTATT     | AGCACCTAGCTGGATTTCATTC   |
| CaUBI-3               | TGTCCATCTGCTCTCTGTTG     | CACCCCAAGCACAATAAGAC     |
| Ca ACT                | TGTTATGGTAGGGATGGGTC     | TTCTCTCTATTTGCCTTGGG     |
